# Supplementary material for: The muscle nutritional components analysis of golden pompano (Trachinotus blochii) in different mariculture area, growth stages, and genders
Source: Front Nutr. 2023 Aug 4;10:1148687. doi: 10.3389/fnut.2023.1148687 (PMC10436298; doi:10.3389/fnut.2023.1148687)
Supplement: Supplementary file 2 [file Table_2.XLS]

## Sheet: Sheet1
Amino acids	FAO/WHO	Egg protein	Early Stage (250g)		Middle Stage(500g )		Late Stage(750g )
			AAS	CS	AAS	CS	AAS	CS
Met+Cys	220	386	0.56 ± 0.04	0.32 ± 0.01	0.57 ± 0.02	0.32 ± 0.02	0.58 ± 0.02	0.33 ± 0.02
Val	310	410	0.65 ± 0.04	0.49 ± 0.01	0.67 ± 0.02	0.51 ± 0.02	0.69 ± 0.03	0.52 ± 0.02
Ile	250	331	0.72 ± 0.05	0.55 ± 0.01	0.74 ± 0.01	0.56 ± 0.03	0.76 ± 0.03	0.58 ± 0.02
Leu	440	534	0.73 ± 0.06	0.60 ± 0.01	0.75 ± 0.02	0.62 ± 0.03	0.76 ± 0.03	0.6 ± 0.03
Phe+Tyr	380	565	0.79 ± 0.06	0.53 ± 0.01	0.82 ± 0.02	0.55 ± 0.03	0.84 ± 0.03	0.57 ± 0.02
Thr	250	292	0.76 ± 0.05	0.65 ± 0.02	0.78 ± 0.02	0.67 ± 0.03	0.79 ± 0.03	0.68 ± 0.03
Lys	340	441	1.12 ± 0.09	0.87 ± 0.02	1.14 ± 0.02	0.88 ± 0.04	1.17 ± 0.05	0.90 ± 0.04
EAAI			55.09 ± 1.10		56.51 ± 2.19		57.78 ± 2.19
