# Supplementary material for: The muscle nutritional components analysis of golden pompano (Trachinotus blochii) in different mariculture area, growth stages, and genders
Source: Front Nutr. 2023 Aug 4;10:1148687. doi: 10.3389/fnut.2023.1148687 (PMC10436298; doi:10.3389/fnut.2023.1148687)
Supplement: Supplementary file 3 [file Table_3.XLS]

## Sheet: Sheet1
Amino acids	FAO/WHO	Egg protein	Female		Male
			AAS	CS	AAS	CS
Met+Cys	220	386	0.62 ± 0.01	0.35 ± 0.01	0.54 ± 0.06	0.31 ± 0.03
Val	310	410	0.72 ± 0.02	0.54 ± 0.01	0.67 ± 0.10	0.51 ± 0.07
Ile	250	331	0.80 ± 0.20	0.61 ± 0.02	0.73 ± 0.10	0.55 ± 0.08
Leu	440	534	0.81 ± 0.20	0.66 ± 0.01	0.71 ± 0.80	0.58 ± 0.07
Phe+Tyr	380	565	0.89 ± 0.20	0.60 ± 0.01	0.78 ± 0.10	0.52 ± 0.05
Thr	250	292	0.84 ± 0.02	0.72 ± 0.01	0.73 ± 0.08	0.63 ± 0.07
Lys	340	441	1.24 ± 0.02	0.96 ± 0.02	1.10 ± 0.12	0.85 ± 0.09
EAAI			61.14 ± 1.26		54.35 ± 6.41
