# Supplementary material for: The muscle nutritional components analysis of golden pompano (Trachinotus blochii) in different mariculture area, growth stages, and genders
Source: Front Nutr. 2023 Aug 4;10:1148687. doi: 10.3389/fnut.2023.1148687 (PMC10436298; doi:10.3389/fnut.2023.1148687)
Supplement: Supplementary file 4 [file Table_4.XLSX]

## Sheet: Sheet1
Table S1 weight of golden pompano(Trachinotus blochii)
classification	number	weight（g）	average weight（g）	content
different mariculture area	1	515.929	500.74±20.09	HN500g
	2	502.132
	3	503.855
	4	503.227
	5	500.333
	6	488.679
	7	505.902
	8	488.026
	9	509.187
	10	523.838
	11	461.841		HN500g
	12	502.875
	13	518.673
	14	494.238
	15	530.993
	16	483.068
	17	465.944
	18	511.894
	19	492.889
	20	492.38
	21	519		HN500g
	22	485.61
	23	464.533
	24	434.162
	25	512.769
	26	509.414
	27	504.077
	28	512.647
	29	507.1
	30	492.182
	31	483.043		GD500g
	32	485.113
	33	483.183
	34	479.253
	35	478.322
	36	479.392
	37	492.462
	38	486.532
	39	469.601
	40	486.671
	41	494.741		GD500g
	42	492.811
	43	480.88
	44	498.95
	45	477.02
	46	455.089
	47	453.159
	48	451.229
	49	509.299
	50	487.368
	51	505.438		GD500g
	52	493.508
	53	503.578
	54	519.647
	55	507.717
	56	535.787
	57	483.857
	58	501.926
	59	519.996
	60	562.066
	61	526.136		GX500g
	62	524.205
	63	522.275
	64	520.345
	65	518.414
	66	516.484
	67	514.554
	68	512.624
	69	500.693
	70	508.763
	71	506.833		GX500g
	72	504.903
	73	502.972
	74	501.042
	75	509.112
	76	507.182
	77	515.251
	78	523.321
	79	491.391
	80	509.461
	81	487.53		GX500g
	82	485.6
	83	483.67
	84	501.739
	85	519.809
	86	527.879
	87	513.949
	88	473.018
	89	471.088
	90	470.158
	91	488.228		FJ500g
	92	496.297
	93	484.367
	94	502.437
	95	500.507
	96	518.576
	97	506.646
	98	504.716
	99	502.786
	100	550.855
	101	528.925		FJ500g
	102	506.995
	103	515.064
	104	523.134
	105	491.204
	106	479.274
	107	537.343
	108	505.413
	109	503.483
	110	501.553
	111	479.622		FJ500g
	112	527.692
	113	505.762
	114	523.832
	115	501.301
	116	501.972
	117	502.011
	118	506.111
	119	514.789
	120	512.23
different growth stages	121	246.2	250.05±13.11	HN250g
	122	242.7
	123	251.3
	124	260.9
	125	271.4
	126	243.3
	127	239.2
	128	239.6
	129	255.8
	130	217
	131	249.5		HN250g
	132	231.1
	133	270.1
	134	261.5
	135	249.1
	136	264.3
	137	246.2
	138	256.4
	139	233.7
	140	242.3
	141	243.8		HN250g
	142	272.2
	143	259.7
	144	245.3
	145	240.5
	146	260.8
	147	256.9
	148	269.4
	149	238.1
	150	243.2
	151	515.929	497.91±20.61	HN500g
	152	502.132
	153	503.855
	154	503.227
	155	500.333
	156	488.679
	157	505.902
	158	488.026
	159	509.187
	160	523.838
	161	461.841		HN500g
	162	502.875
	163	518.673
	164	494.238
	165	530.993
	166	483.068
	167	465.944
	168	511.894
	169	492.889
	170	492.38
	171	519		HN500g
	172	485.61
	173	464.533
	174	434.162
	175	512.769
	176	509.414
	177	504.077
	178	512.647
	179	507.1
	180	492.182
	181	743.7	749.23±24.57	HN750g
	182	756.1
	183	775.2
	184	764.1
	185	735.3
	186	729.6
	187	774.8
	188	711.2
	189	731.9
	190	778.1
	191	752		HN750g
	192	771.2
	193	767.4
	194	721.3
	195	738.1
	196	694.7
	197	715.8
	198	722.7
	199	762.3
	200	735.1
	201	748.6		HN750g
	202	760.8
	203	741.6
	204	751.7
	205	797.5
	206	787.4
	207	737.4
	208	727.3
	209	781.5
	210	762.5
different genders	211	479.837	512.36±30.2	HN500g♀
	212	513.361
	213	520.806
	214	510.64
	215	463.96
	216	517.974
	217	461.112
	218	535.083
	219	500.466
	220	548.971
	221	506.843		HN500g♀
	222	475.715
	223	498.944
	224	540.99
	225	517.983
	226	475.658
	227	490.107
	228	469.09
	229	537.785
	230	517.764
	231	549.8		HN500g♀
	232	505.908
	233	542.926
	234	567.299
	235	522.518
	236	464.314
	237	593.462
	238	543.25
	239	535.777
	240	558.757
	241	515.929		HN500g♂
	242	532.132
	243	533.855
	244	540.227
	245	500.333
	246	488.679
	247	505.902
	248	488.026
	249	539.187
	250	523.838
	251	461.841		HN500g♂
	252	502.875
	253	518.673
	254	494.238
	255	530.993
	256	533.068
	257	465.944
	258	511.894
	259	492.889
	260	492.38
	261	469		HN500g♂
	262	525.61
	263	464.533
	264	534.162
	265	472.769
	266	549.414
	267	534.077
	268	552.647
	269	507.1
	270	492.182
