# Supplementary material for: The muscle nutritional components analysis of golden pompano (Trachinotus blochii) in different mariculture area, growth stages, and genders
Source: Front Nutr. 2023 Aug 4;10:1148687. doi: 10.3389/fnut.2023.1148687 (PMC10436298; doi:10.3389/fnut.2023.1148687)
Supplement: Supplementary file 5 [file Table_5.XLS]

## Sheet: Sheet1
Composition	HN	GD	GX	FJ
Asp	1.93 ± 0.10	1.81 ± 0.10	1.75 ± 0.12	2.00 ± 0.05
Thr	0.89 ± 0.05	0.84 ± 0.05	0.82 ± 0.06	0.94 ± 0.02
Ser	0.76 ± 0.04	0.71 ± 0.05	0.71 ± 0.05	0.78 ± 0.01
Glu	2.89 ± 0.14	2.73 ± 0.20	2.64 ± 0.20	3.01 ± 0.09
Pro	0.65 ± 0.04	0.63 ± 0.04	0.72 ± 0.16	0.70 ± 0.06
Gly	1.02 ± 0.06	0.94 ± 0.10	1.16 ± 0.34	1.04 ± 0.09
Ala	1.14 ± 0.06	1.08 ± 0.07	1.12 ± 0.15	1.22 ± 0.05
Val	0.95 ± 0.05	0.89 ± 0.04	0.86 ± 0.05	1.00 ± 0.03
Met	0.57 ± 0.04	0.51 ± 0.08	0.53 ± 0.04	0.61 ± 0.03
Ile	0.85 ± 0.04	0.80 ± 0.04	0.78 ± 0.05	0.90 ± 0.03
Leu	1.52 ± 0.07	1.43 ± 0.08	1.38 ± 0.09	1.59 ± 0.04
Tyr	0.66 ± 0.04	0.62 ± 0.03	0.60 ± 0.04	0.70 ± 0.02
Phe	0.76 ± 0.04	0.71 ± 0.04	0.71 ± 0.04	0.78 ± 0.02
Lys	1.78 ± 0.09	1.69 ± 0.10	1.61 ± 0.12	1.88 ± 0.05
His	0.47 ± 0.03	0.43 ± 0.03	0.40 ± 0.03	0.48 ± 0.01
Arg	1.16 ± 0.06	1.10 ± 0.07	1.13 ± 0.12	1.22 ± 0.03
TAA	18.00 ± 0.94	16.93 ± 1.12	16.94 ± 1.35	18.84 ± 0.43
EAA	7.99 ± 0.43	7.50 ± 0.43	7.29 ± 0.46	8.40 ± 0.22
NEAA	10.01 ± 0.52	9.43 ± 0.64	9.64 ± 1.02	10.44 ± 0.27
DAA	6.98 ± 0.36	6.56 ± 0.47	6.68 ± 0.71	7.26 ± 0.18
EAA/TAA,%	44.39	44.29	43.13	44.58
EAA/NEAA,%	79.82	79.49	75.99	80.44
DAA/TAA,%	38.76	38.76	39.37	38.56
moisture	71.40 ± 1.10	73.33 ± 1.35	66.33 ± 1.10	69.97 ± 1.60
ash	1.33 ± 0.12	1.20 ± 0.17	1.07 ± 0.15	1.20 ± 0.00
