# Supplementary material for: The muscle nutritional components analysis of golden pompano (Trachinotus blochii) in different mariculture area, growth stages, and genders
Source: Front Nutr. 2023 Aug 4;10:1148687. doi: 10.3389/fnut.2023.1148687 (PMC10436298; doi:10.3389/fnut.2023.1148687)
Supplement: Supplementary file 6 [file Table_6.XLS]

## Sheet: Sheet1
Composition	HN	GD	GX	FJ
C12:0	0.023 ± 0.0010	0.036 ± 0.0010	0.023 ± 0.0004	0.016 ± 0.0008
C13:0	0.009 ± 0.0004	0.012 ± 0.0010	0.007 ± 0.0002	0.006 ± 0.0002
C14:0	1.740 ± 0.0100	1.790 ± 0.0500	1.530 ± 0.0200	1.400± 0.0100
C14:1	0.017 ± 0.0002	0.026 ± 0.0020	0.018 ± 0.0006	0.023 ± 0.0020
C15:0	0.208 ± 0.0040	0.286 ± 0.0040	0.184 ± 0.0030	0.161 ± 0.0030
C16:0	22.670 ± 0.1500	25.400 ± 0.6200	23.330 ± 0.3200	22.400 ± 0.1000
C16:1	2.650 ± 0.0300	2.940 ± 0.1000	2.560 ± 0.0800	2.850 ± 0.2300
C17:0	0.236 ± 0.0060	0.279 ± 0.0040	0.216 ± 0.0040	0.191 ± 0.0040
C18:0	5.630 ± 0.0500	6.350 ± 0.1200	5.840 ± 0.2300	5.500 ± 0.4600
C18:1n9t	0.212 ± 0.0030	0.287 ± 0.0100	0.244 ± 0.0010	0.283 ± 0.0180
C18:1n9c	25.930 ± 0.7600	27.870± 0.4000	27.470 ± 0.2500	30.530 ± 0.4600
C18:2n6c	24.770 ± 0.6700	21.170 ± 0.4700	25.630 ± 0.2900	21.770 ± 0.1200
C18:3n6	0.045 ± 0.0030	0.084 ± 0.0030	0.039 ± 0.0010	0.024 ± 0.0010
C18:3n3	2.480 ± 0.0700	1.960 ± 0.0600	2.410 ± 0.0400	1.710 ± 0.0600
C20:0	0.369 ± 0.0050	0.386 ± 0.0100	0.394 ± 0.0100	0.417 ± 0.0200
C20:1	1.730 ± 0.1000	1.750 ± 0.0900	1.580 ± 0.0100	2.520 ± 0.1200
C20:2	2.110 ± 0.0600	1.730 ± 0.1000	1.590 ± 0.0100	2.040 ± 0.1200
C20:3n6	0.106 ± 0.0040	0.210 ± 0.0060	0.081 ± 0.0020	0.110 ± 0.0010
C21:0	0.051 ± 0.0090	0.064 ± 0.0020	0.060 ± 0.0002	0.048 ± 0.0040
C20:4n6	0.290 ± 0.0300	0.400 ± 0.0200	0.240 ± 0.0100	0.450 ± 0.0500
C20:3n3	0.580 ± 0.0100	0.430 ± 0.0300	0.400 ± 0.0100	0.500 ± 0.0300
C20:5n3	0.860 ± 0.0200	0.690 ± 0.0200	0.760 ± 0.0200	0.440 ± 0.0200
C22:0	0.390 ± 0.0100	0.400 ± 0.0100	0.460 ± 0.0200	0.440 ± 0.0200
C22:1n9	0.610 ± 0.0200	0.580 ± 0.0300	0.530 ± 0.0100	0.780 ± 0.0400
C22:2	0.450± 0.0100	0.350 ± 0.0200	0.340 ± 0.0100	0.380 ± 0.0200
C23:0	0.104 ± 0.0050	0.102± 0.0030	0.100 ± 0.0040	0.092 ± 0.0060
C24:0	0.200 ± 0.0120	0.210 ± 0.0030	0.240 ± 0.0150	0.200± 0.0050
C22:6n3	5.000 ± 0.3200	3.690 ± 0.1200	3.210 ± 0.0700	4.010 ± 0.3700
C24:1	0.570 ± 0.0270	0.540 ± 0.0300	0.530 ± 0.0300	0.670 ± 0.0200
SFA	31.630 ± 0.1600	35.310 ± 0.5400	32.390 ± 0.6000	30.870 ± 0.5300
MUFA	31.720 ± 0.8800	33.990 ± 0.5300	32.930 ± 0.3000	37.650 ± 0.7200
PUFA	36.680 ± 0.9400	30.720 ± 0.6900	34.700 ± 0.2800	31.430 ± 0.2500
EPA+DHA	5.860± 0.3200	4.380 ± 0.1300	3.970 ± 0.0700	4.450 ± 0.3500
∑PUFAω-3	8.920 ± 0.3500	6.780 ± 0.1800	6.770 ± 0.0500	6.660 ± 0.3100
∑ PUFAω-6	25.200 ± 0.6900	21.860 ± 0.5000	25.990 ± 0.2800	22.350 ± 0.1100
∑PUFAω-3/∑ PUFAω-6	0.350 ± 0.0090	0.310 ± 0.0020	0.260 ± 0.0040	0.298 ± 0.0130
AI	0.370 ± 0.0000	0.430± 0.0200	0.380 ± 0.0200	0.357 ± 0.0200
TI	0.540 ± 0.0100	0.690 ± 0.0200	0.620 ± 0.0300	0.580 ± 0.0300
PI	0.260 ± 0.0200	0.170 ± 0.0100	0.170 ± 0.0300	0.197 ± 0.0300
