# Supplementary material for: The muscle nutritional components analysis of golden pompano (Trachinotus blochii) in different mariculture area, growth stages, and genders
Source: Front Nutr. 2023 Aug 4;10:1148687. doi: 10.3389/fnut.2023.1148687 (PMC10436298; doi:10.3389/fnut.2023.1148687)
Supplement: Supplementary file 7 [file Table_7.XLS]

## Sheet: Sheet1
Composition	Early Stage (250g)	Middle Stage (500g )	Late Stage (750g )
Asp	1.91 ± 0.05	1.93 ± 0.10	1.96 ± 0.02
Thr	0.89 ± 0.03	0.89 ± 0.05	0.91 ± 0.01
Ser	0.74 ± 0.02	0.76 ± 0.04	0.78 ± 0.02
Glu	2.80 ± 0.04	2.89 ± 0.14	2.92 ± 0.07
Pro	0.66 ± 0.04	0.65 ± 0.04	0.70 ± 0.03
Gly	1.03 ± 0.09	1.02 ± 0.06	1.09 ± 0.05
Ala	1.14 ± 0.04	1.14 ± 0.06	1.18 ± 0.02
Val	0.95 ± 0.03	0.95 ± 0.05	0.98 ± 0.01
Met	0.58 ± 0.01	0.57 ± 0.04	0.59 ± 0.01
Ile	0.85 ± 0.02	0.85 ± 0.05	0.88 ± 0.00
Leu	1.51 ± 0.02	1.52 ± 0.07	1.55 ± 0.01
Tyr	0.66 ± 0.02	0.66 ± 0.04	0.69 ± 0.01
Phe	0.76 ± 0.02	0.76 ± 0.04	0.79 ± 0.01
Lys	1.80 ± 0.02	1.78 ± 0.09	1.83 ± 0.01
His	0.46 ± 0.02	0.47 ± 0.03	0.48 ± 0.01
Arg	1.16 ± 0.03	1.16 ± 0.06	1.22 ± 0.02
TAA	17.93 ± 0.45	17.97 ± 0.95	18.57 ± 0.05
EAA	7.99 ± 0.14	7.99 ± 0.43	8.23 ± 0.05
NEAA	9.94 ± 0.31	9.98 ± 0.52	10.34 ± 0.23
DAA	6.89 ± 0.21	6.98 ± 0.36	7.15 ± 0.14
EAA/TAA,%	44.56	44.47	44.31
EAA/NEAA,%	80.38	80.09	79.58
DAA/TAA,%	38.4	38.83	38.53
moisture	70.57 ± 2.56	71.40 ± 1.10	71.17 ± 1.22
ash	1.23 ± 0.15	1.33 ± 0.12	1.40 ± 0.10
