# Supplementary material for: The muscle nutritional components analysis of golden pompano (Trachinotus blochii) in different mariculture area, growth stages, and genders
Source: Front Nutr. 2023 Aug 4;10:1148687. doi: 10.3389/fnut.2023.1148687 (PMC10436298; doi:10.3389/fnut.2023.1148687)
Supplement: Supplementary file 9 [file Table_9.XLS]

## Sheet: Sheet1
Composition	Female	Male
Asp	1.93 ± 0.04	1.89 ± 0.10
Thr	0.90 ± 0.02	0.87 ± 0.02
Ser	0.76 ± 0.02	0.73 ± 0.02
Glu	2.89 ± 0.07	2.83 ± 0.18
Pro	0.69 ± 0.04	0.71 ± 0.08
Gly	1.06 ± 0.07	1.15 ± 0.20
Ala	1.16 ± 0.04	1.19 ± 0.11
Val	0.95 ± 0.03	0.99 ± 0.10
Met	0.59 ± 0.02	0.56 ± 0.02
Ile	0.86 ± 0.03	0.87 ± 0.07
Leu	1.52 ± 0.04	1.49 ± 0.09
Tyr	0.68 ± 0.02	0.65 ± 0.02
Phe	0.77 ± 0.02	0.76 ± 0.04
Lys	1.81 ± 0.04	1.78 ± 0.10
His	0.46 ± 0.01	0.46 ± 0.03
Arg	1.19 ± 0.03	1.19 ± 0.10
TAA	18.20 ± 0.50	18.13 ± 1.25
EAA	8.07 ± 0.20	7.98 ± 0.49
NEAA	10.13 ± 0.31	10.15 ± 0.77
DAA	7.03 ± 0.19	7.06 ± 0.56
EAA/TAA,%	44.36	44.03
EAA/NEAA,%	79.72	78.67
DAA/TAA,%	38.63	38.92
F（BCAA/AAA）	2.299 ± 0.002	2.368 ± 0.078
moisture	73.23	70.07
ash	1.17	1.2
