# Supplementary material for: The muscle nutritional components analysis of golden pompano (Trachinotus blochii) in different mariculture area, growth stages, and genders
Source: Front Nutr. 2023 Aug 4;10:1148687. doi: 10.3389/fnut.2023.1148687 (PMC10436298; doi:10.3389/fnut.2023.1148687)
Supplement: Supplementary file 10 [file Table_10.XLS]

## Sheet: Sheet1
Composition	Female	Male
C12:0	0.017 ± 0.0015	0.018 ± 0.0007
C13:0	0.005 ± 0.0006	0.006 ± 0.0009
C14:0	1.500 ± 0.0400	1.520 ± 0.0400
C14:1	0.011 ± 0.0006	0.012 ± 0.0006
C15:0	0.152 ± 0.0040	0.154 ± 0.0060
C16:0	22.500 ± 0.3600	23.400 ± 0.4400
C16:1	2.510 ± 0.0600	2.680 ± 0.0500
C17:0	0.190± 0.0030	0.180± 0.0020
C18:0	6.080 ± 0.1400	6.070 ± 0.0900
C18:1n9t	0.210± 0.0040	0.220 ± 0.0200
C18:1n9c	26.570 ± 0.2100	27.600 ± 0.1000
C18:2n6c	24.870 ± 0.5000	23.330 ± 0.4500
C18:3n6	0.039 ± 0.0020	0.036 ± 0.0020
C18:3n3	2.410 ± 0.0300	2.320 ± 0.0700
C20:0	0.350 ± 0.0150	0.350 ± 0.0080
C20:1	1.600 ± 0.0150	1.780 ± 0.0230
C20:2	1.930 ± 0.0500	1.860 ± 0.1200
C20:3n6	0.110 ± 0.0006	0.090 ± 0.0030
C21:0	0.040 ± 0.0030	0.030± 0.0009
C20:4n6	0.300 ± 0.0200	0.270 ± 0.0400
C20:3n3	0.550 ± 0.0300	0.540± 0.0400
C20:5n3	0.840 ± 0.0030	0.790± 0.0300
C22:0	0.360 ± 0.0060	0.360± 0.0110
C22:1n9	0.590 ± 0.0400	0.600 ± 0.0050
C22:2	0.399 ± 0.0300	0.401 ± 0.0200
C23:0	0.055 ± 0.0030	0.064 ± 0.0080
C24:0	0.180 ± 0.0030	0.179 ± 0.0100
C22:6n3	5.060 ± 0.3400	4.630 ± 0.3200
C24:1	0.540 ± 0.0300	0.520 ± 0.0200
SFA	31.440 ± 0.5200	32.350 ± 0.4700
MUFA	32.030 ± 0.1900	33.420 ± 0.1400
PUFA	36.510 ± 0.7100	34.270 ± 0.5900
EPA+DHA	5.900± 0.3400	5.420 ± 0.3500
∑PUFAω-3	8.870 ± 0.3500	8.280 ± 0.2900
∑ PUFAω-6	25.310 ± 0.5100	23.730± 0.4300
∑PUFAω-3/∑ PUFAω-6	0.350 ± 0.0140	0.349 ± 0.0140
AI	0.363 ± 0.0090	0.381 ± 0.0090
TI	0.541 ± 0.0180	0.577 ± 0.0160
PI	0.262 ± 0.0160	0.232 ± 0.0150
